# Supplementary material for: Discretization of the Water Uptake Process of Na‐Montmorillonite Undergoing Atmospheric Stress: XRD Modeling Approach
Source: Hindawi journal article supplement (doi:10.1155/2018/5219624), 2018-01-01
Supplement: f1 [file 5219624.f1.zip]

Archive with 16 entries (16 files):
- Figure S1a.tif
- Figure S1b.tif
- Figure S1c.tif
- Figure S1d.tif
- Figure S2a.tif
- Figure S2b.tif
- Figure S2c.tif
- Figure S2d.tif
- Figure S3a.tif
- Figure S3b.tif
- Figure S3c.tif
- Figure S3d.tif
- Figure S4a.tif
- Figure S4b.tif
- Figure S4c.tif
- Figure S4d.tif
