# Supplementary figures and images for: Discretization of the Water Uptake Process of Na‐Montmorillonite Undergoing Atmospheric Stress: XRD Modeling Approach
Source: Hindawi journal article supplement (doi:10.1155/2018/5219624), 2018-01-01

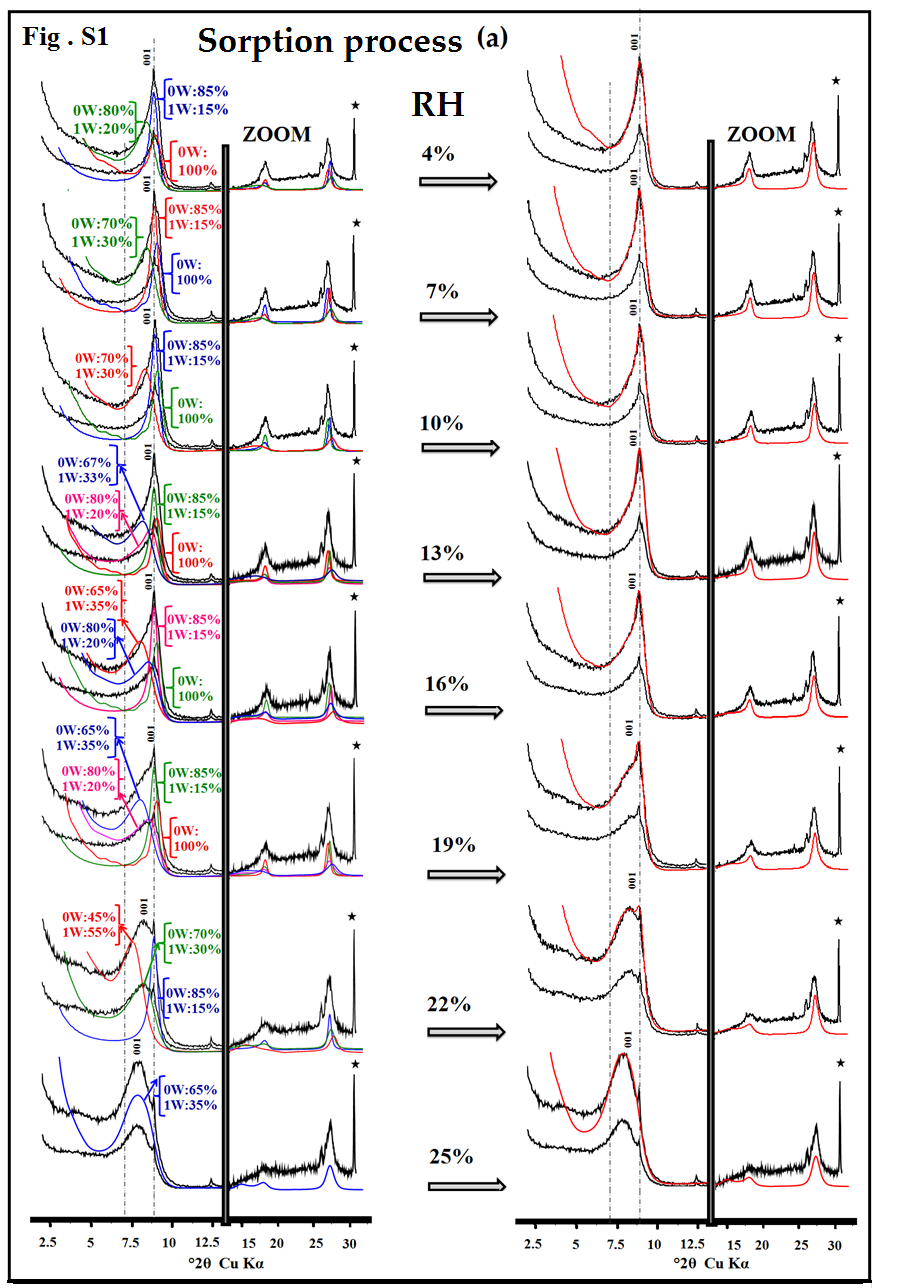

Supplement: f1 [file 5219624.f1.zip › Figure S1a.tif]

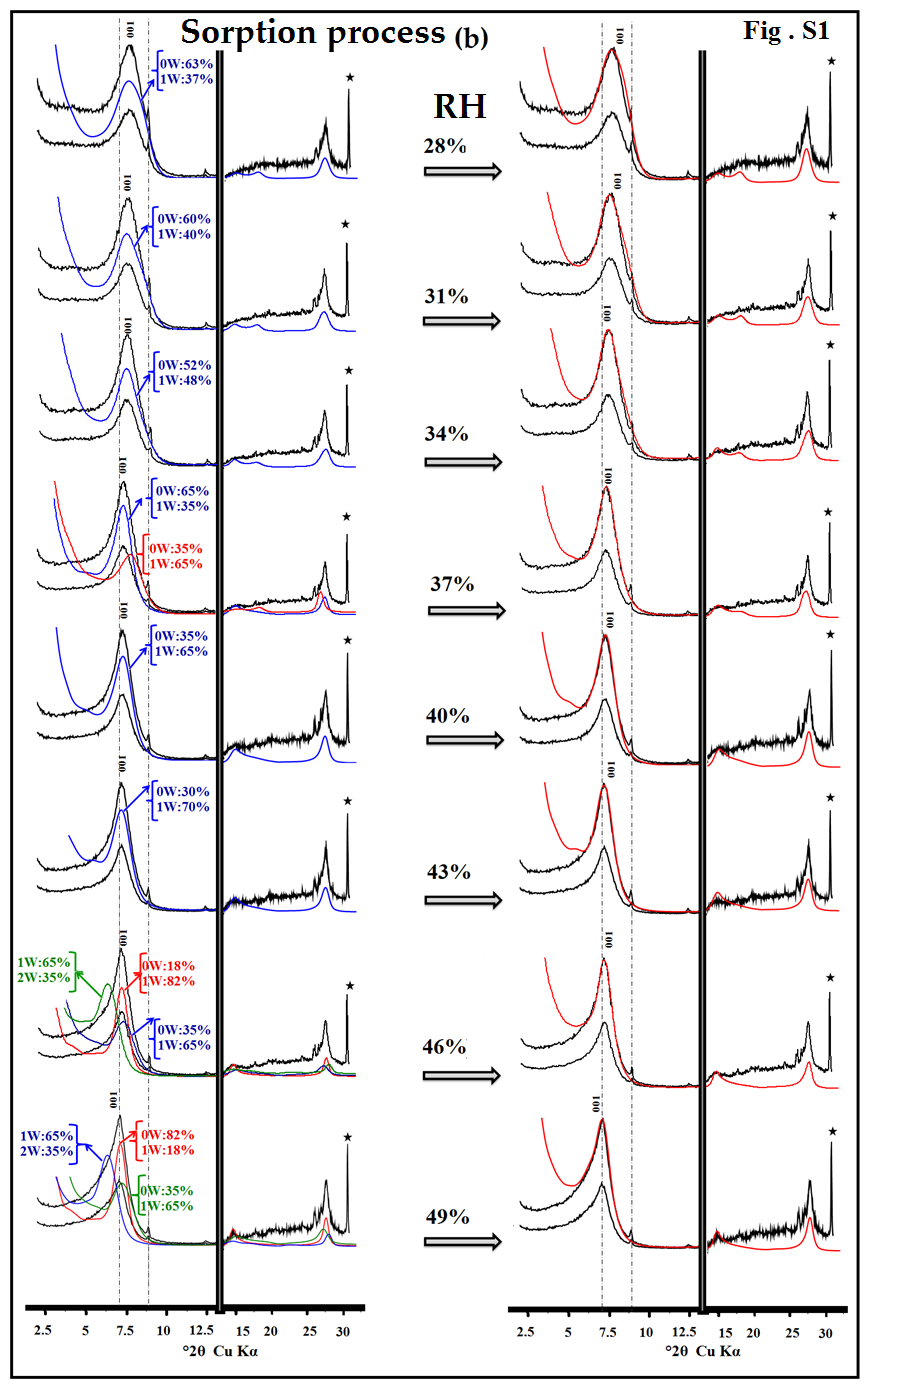

Supplement: f1 [file 5219624.f1.zip › Figure S1b.tif]

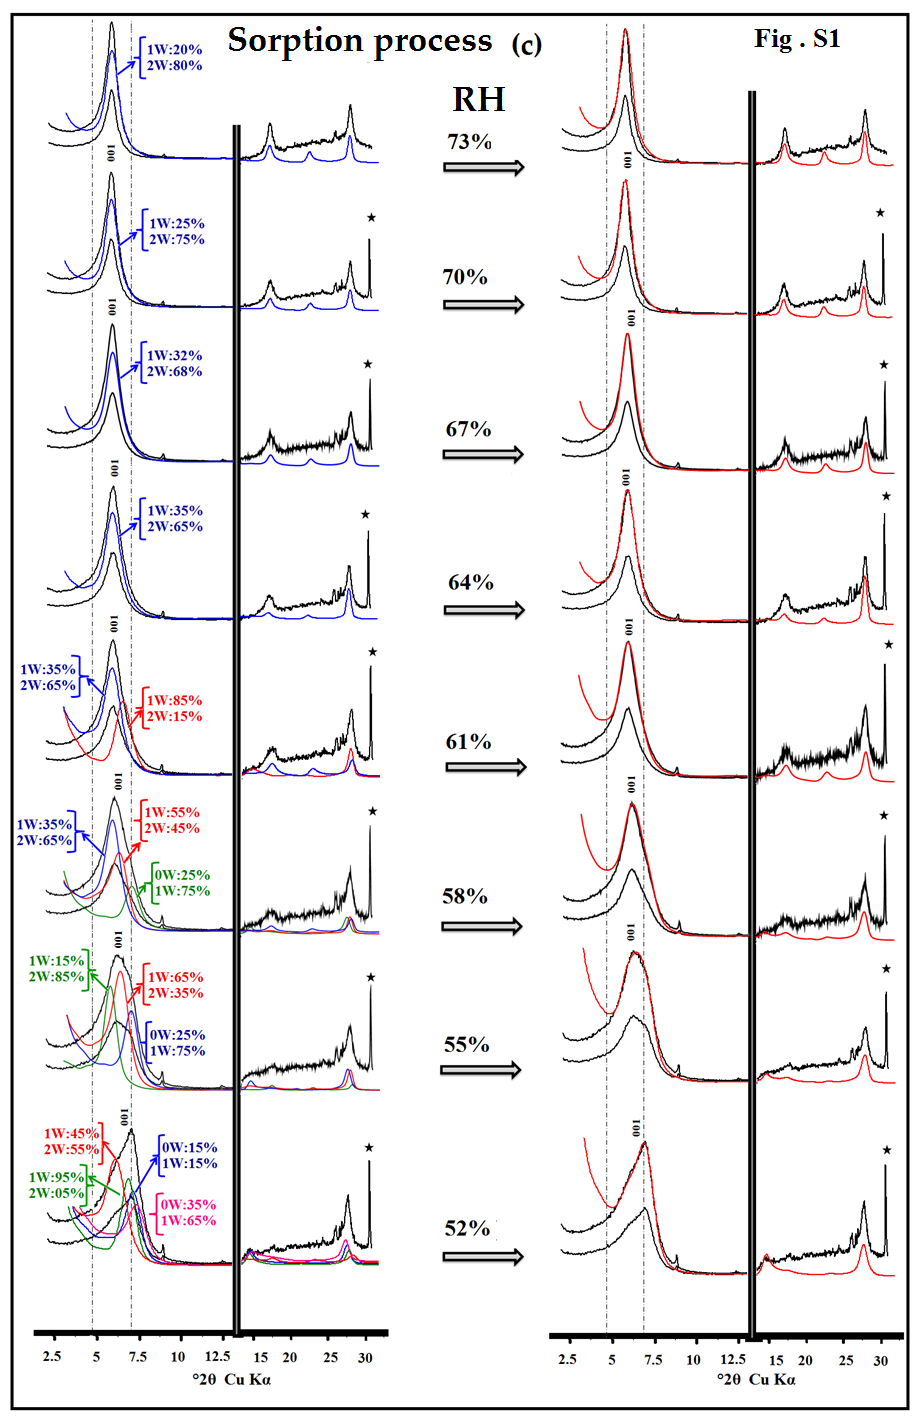

Supplement: f1 [file 5219624.f1.zip › Figure S1c.tif]

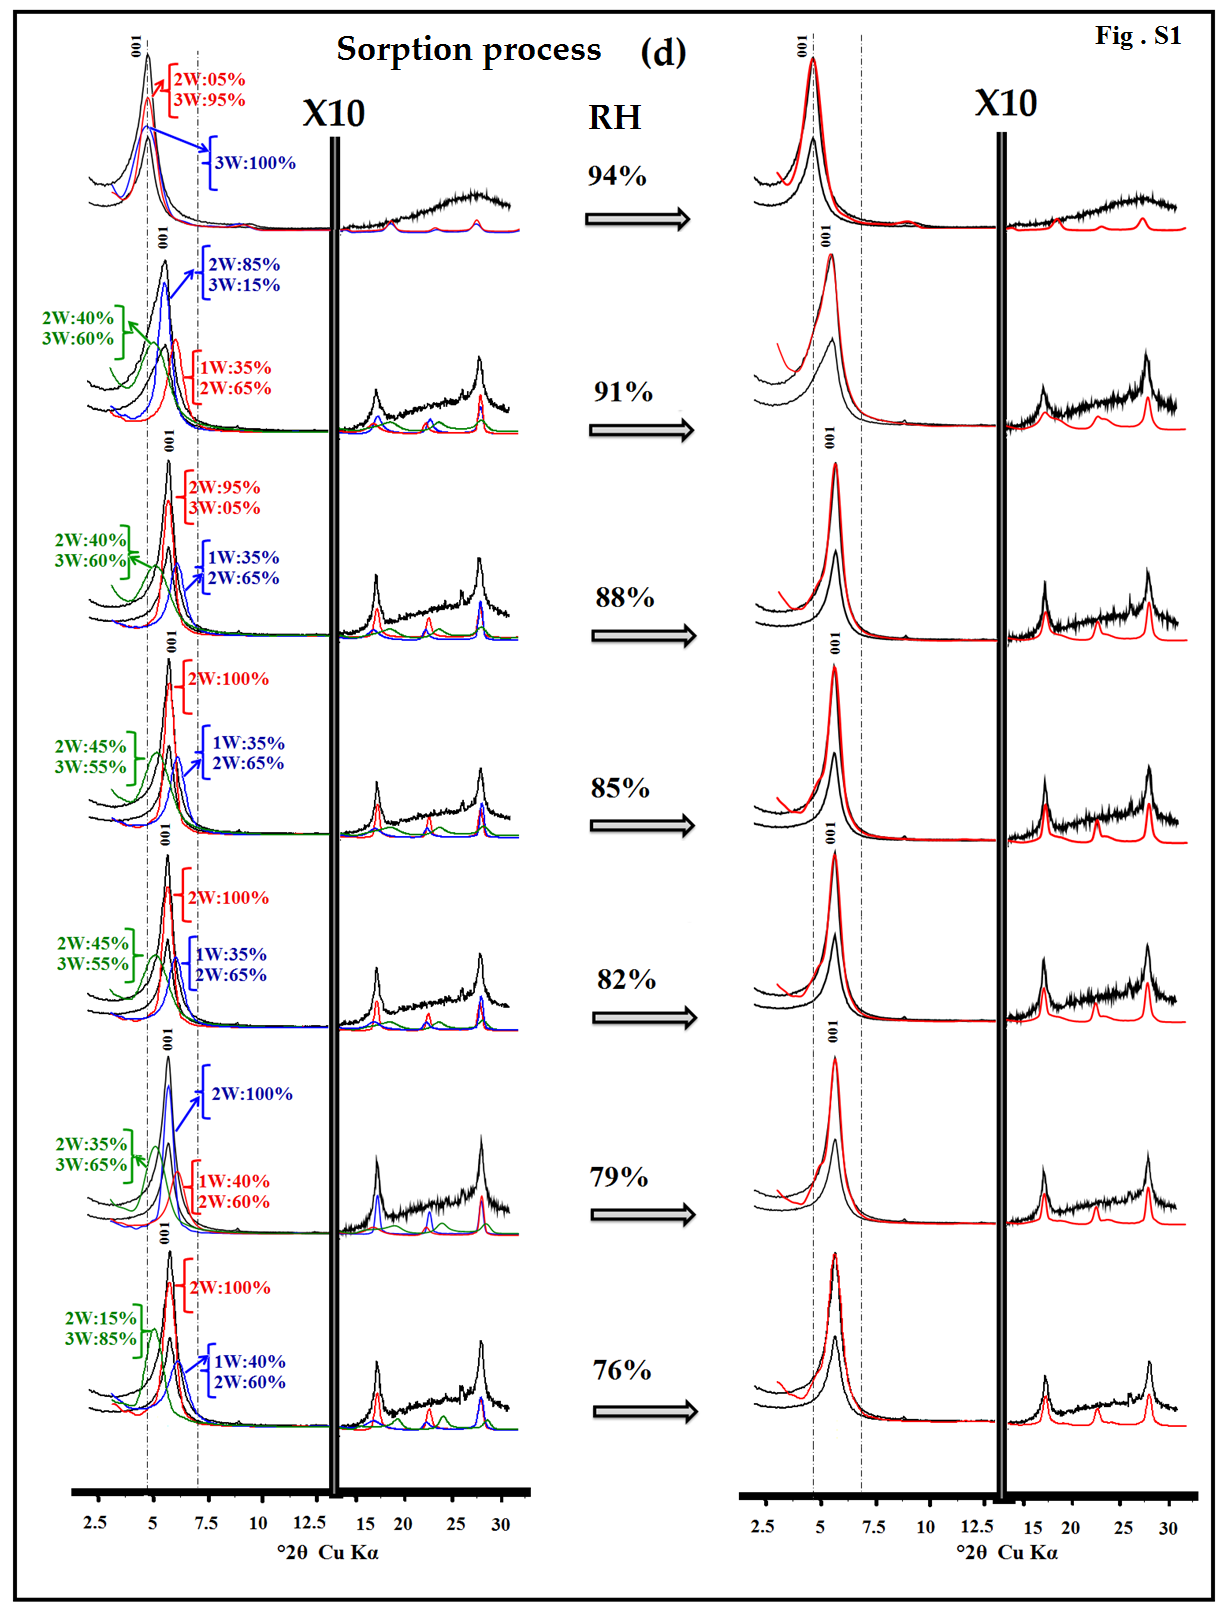

Supplement: f1 [file 5219624.f1.zip › Figure S1d.tif]

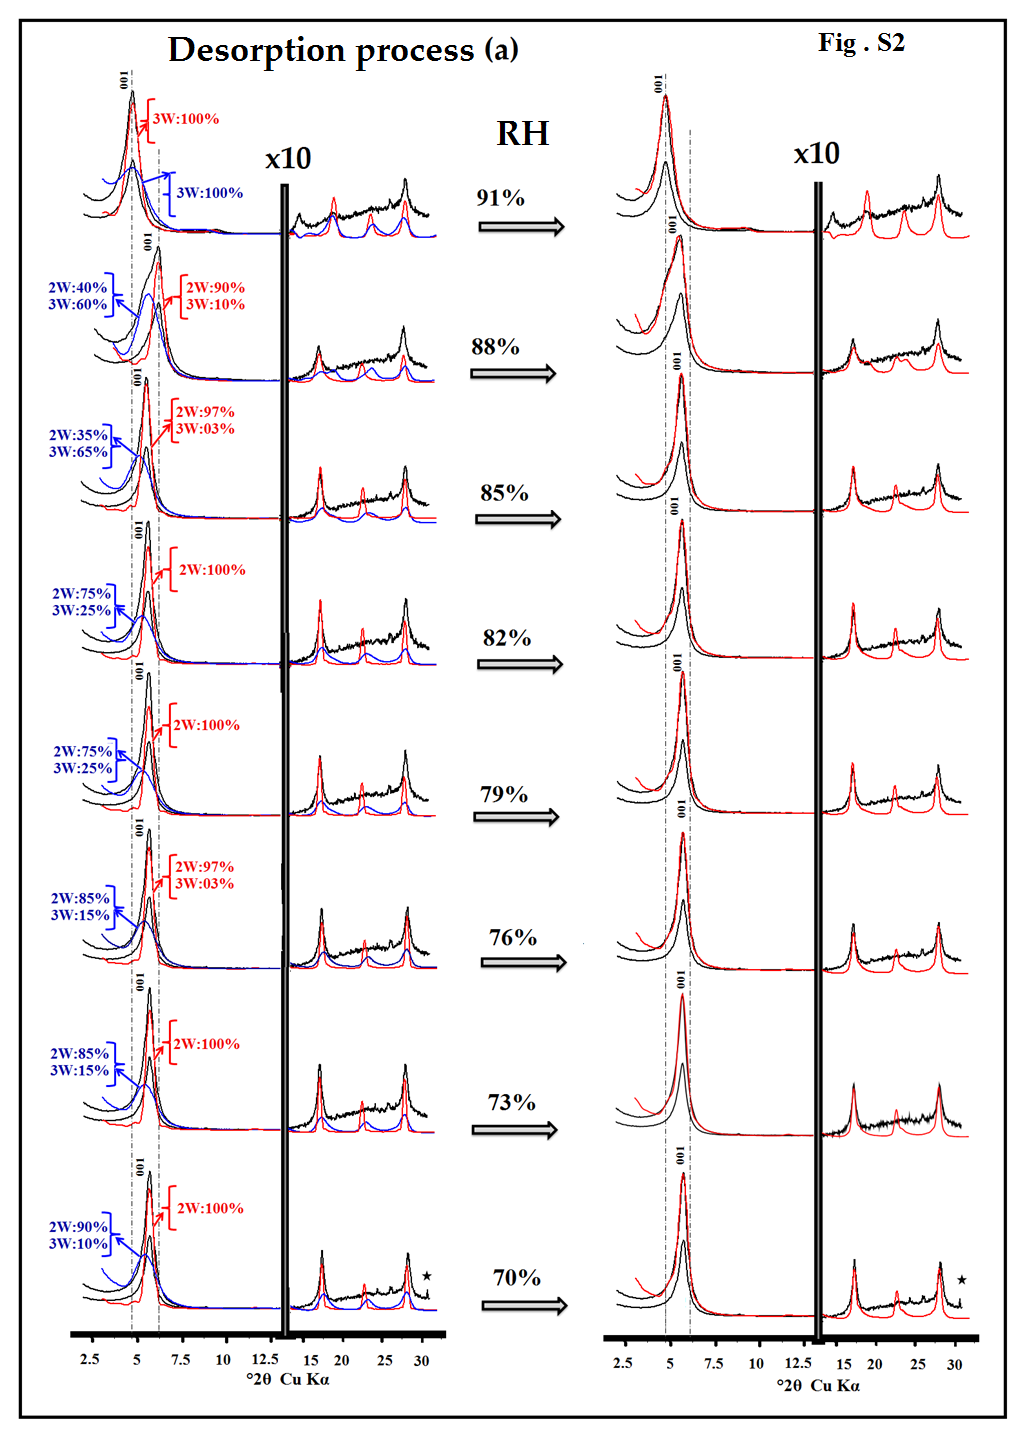

Supplement: f1 [file 5219624.f1.zip › Figure S2a.tif]

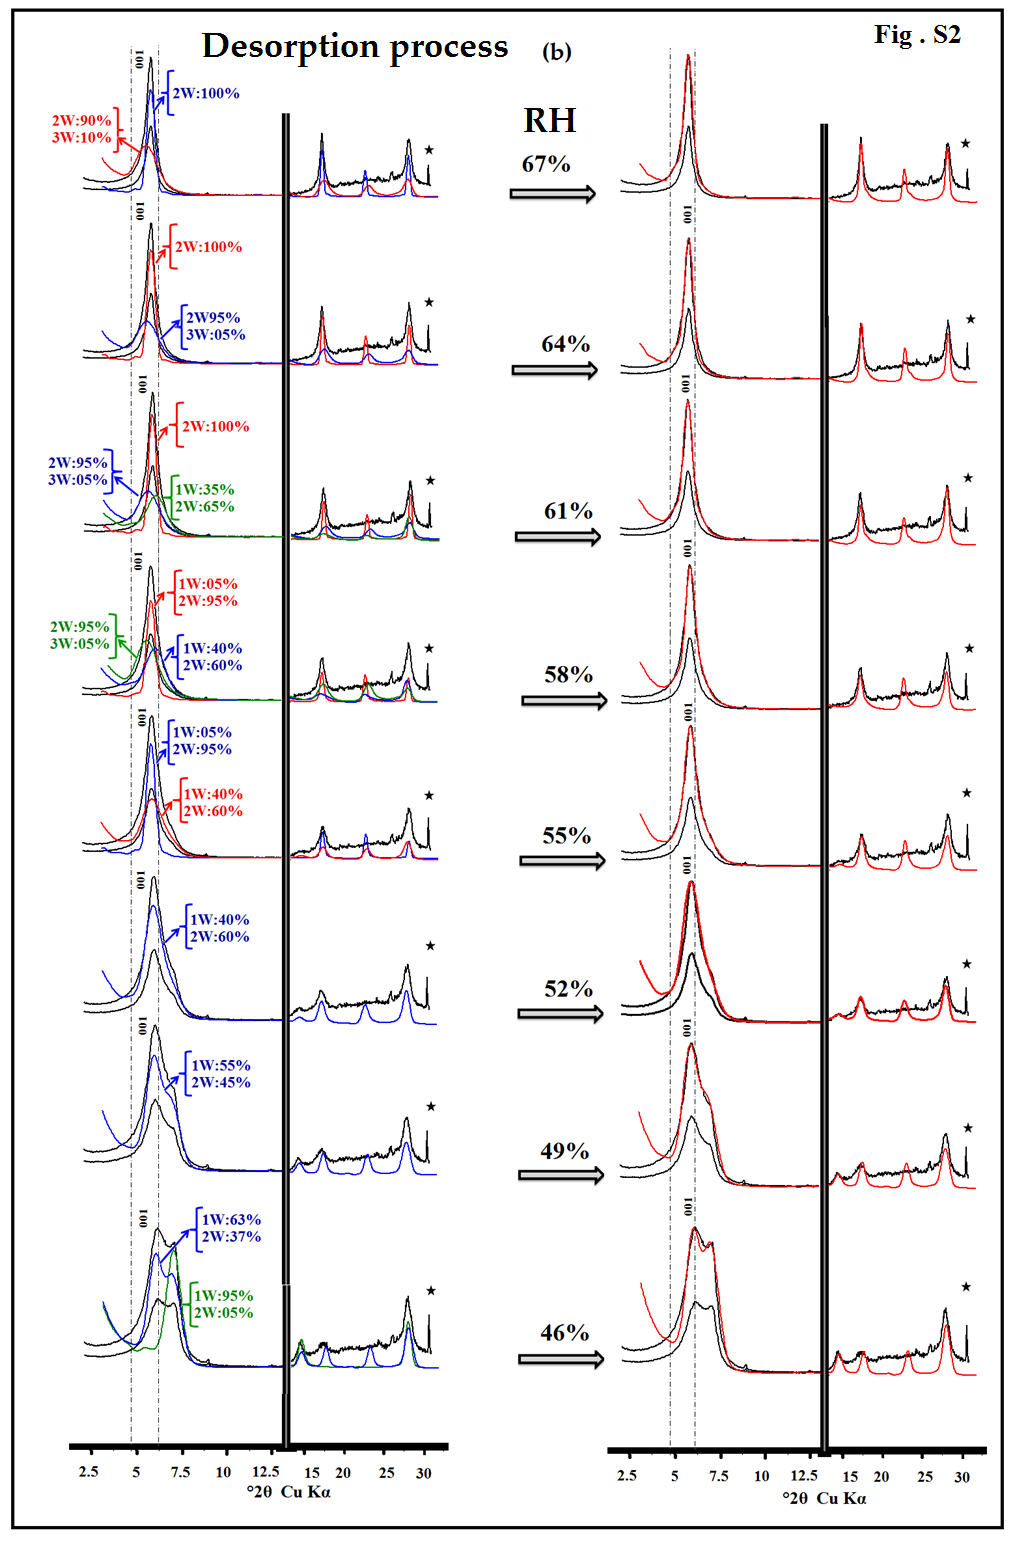

Supplement: f1 [file 5219624.f1.zip › Figure S2b.tif]

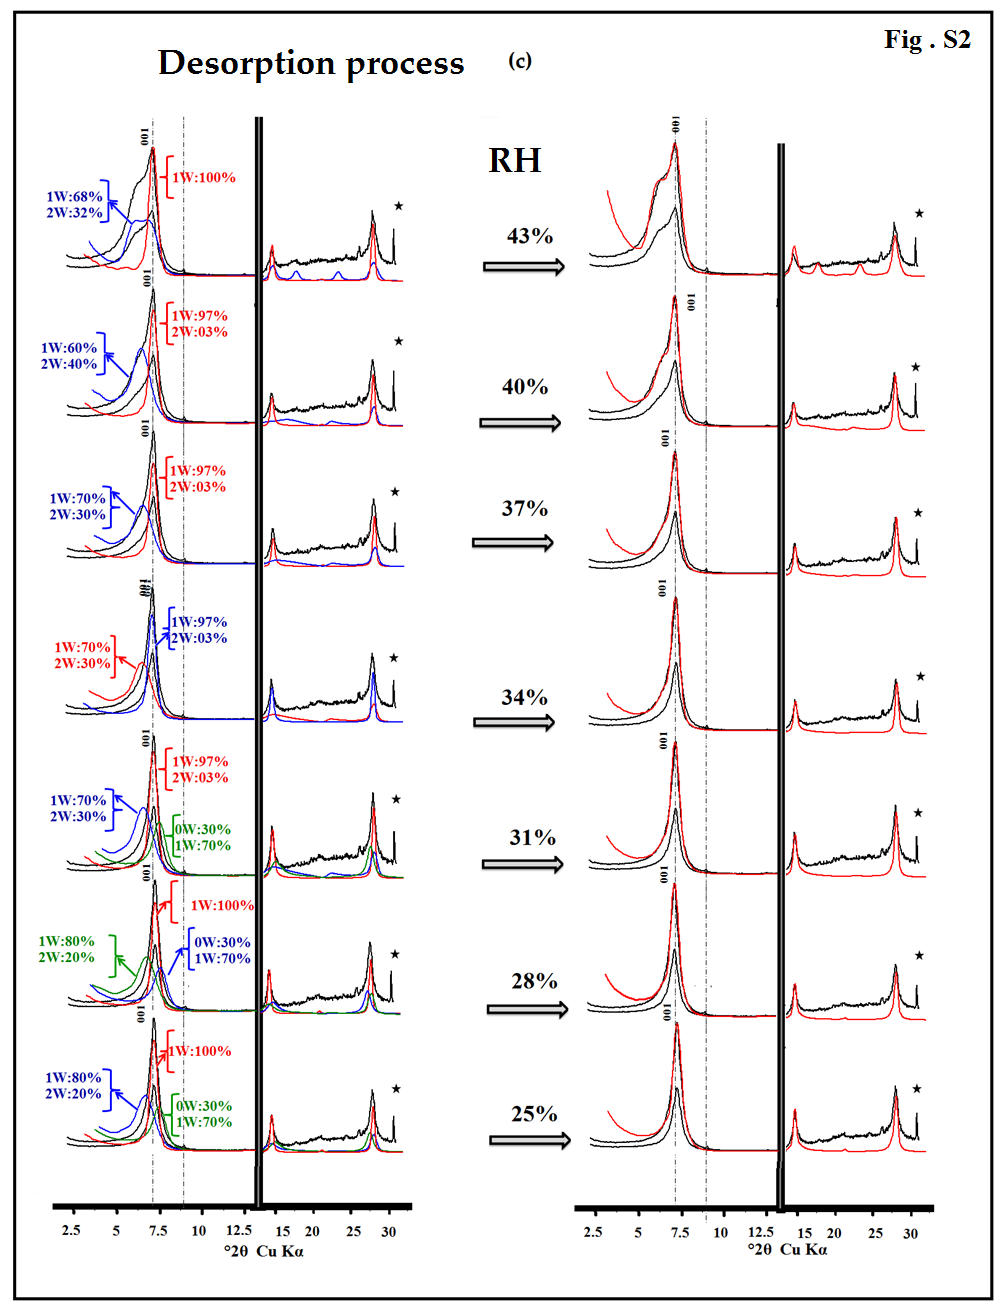

Supplement: f1 [file 5219624.f1.zip › Figure S2c.tif]

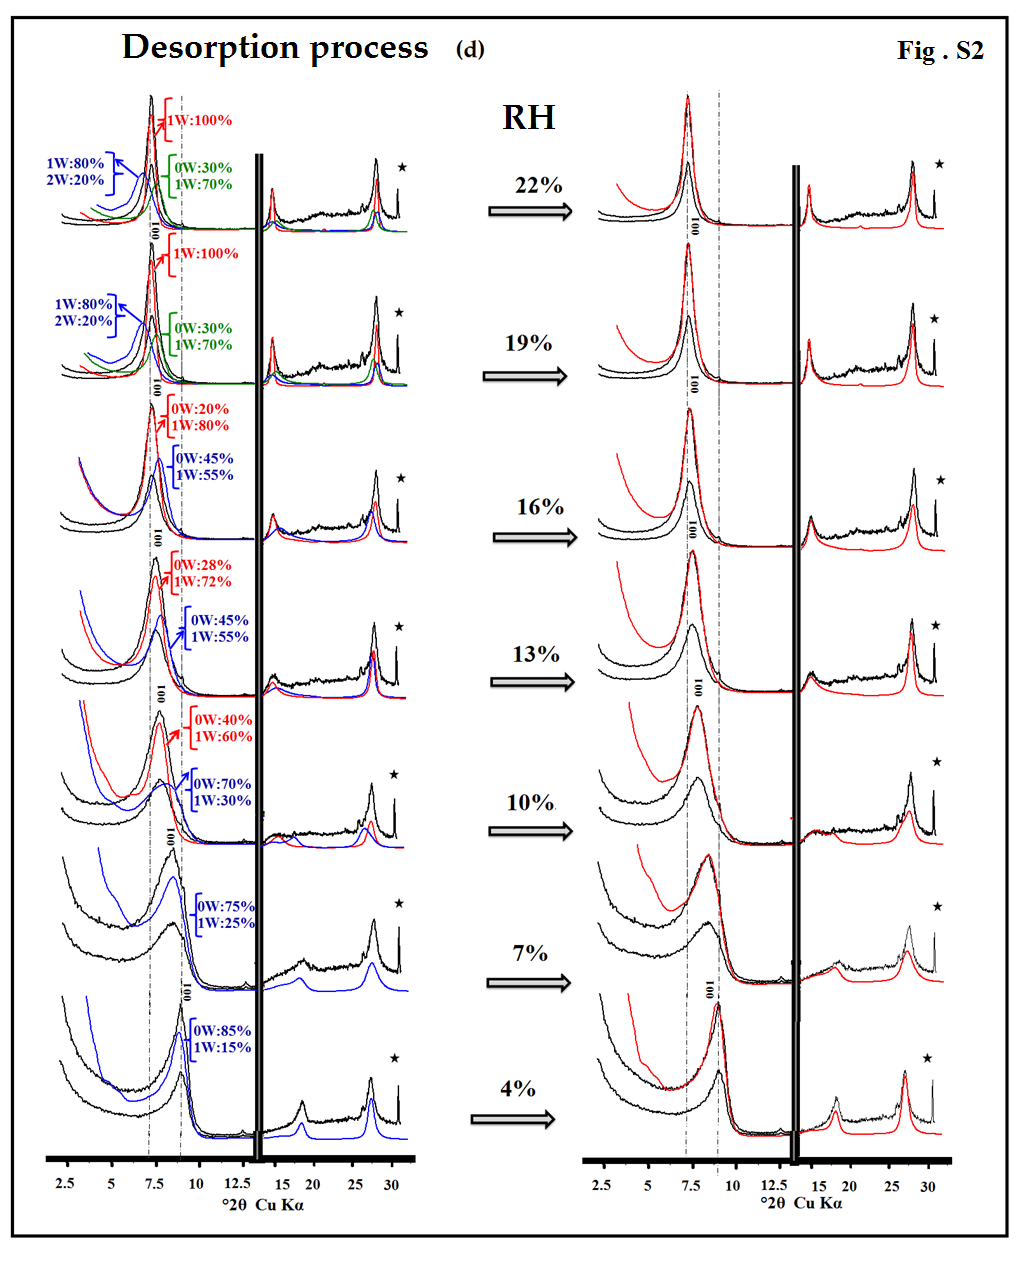

Supplement: f1 [file 5219624.f1.zip › Figure S2d.tif]

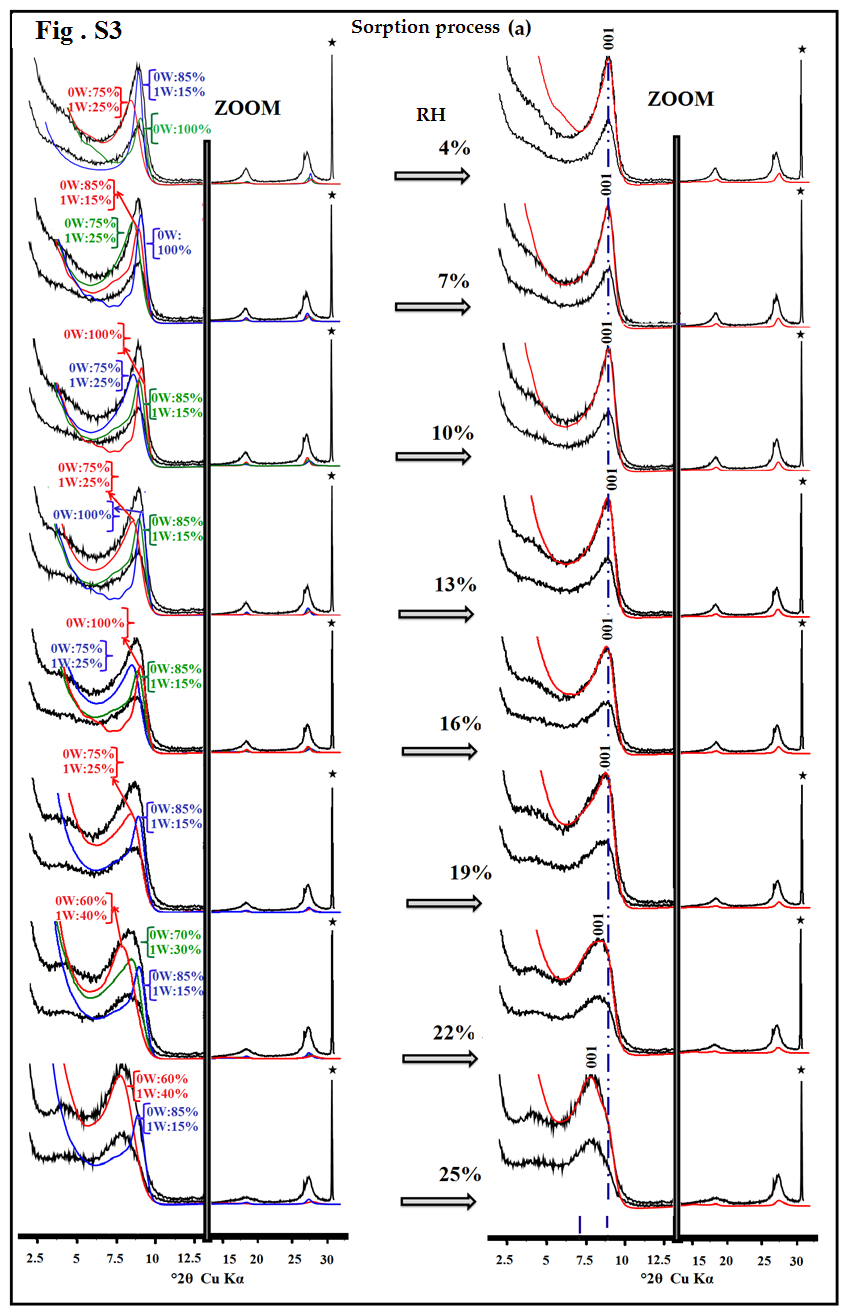

Supplement: f1 [file 5219624.f1.zip › Figure S3a.tif]

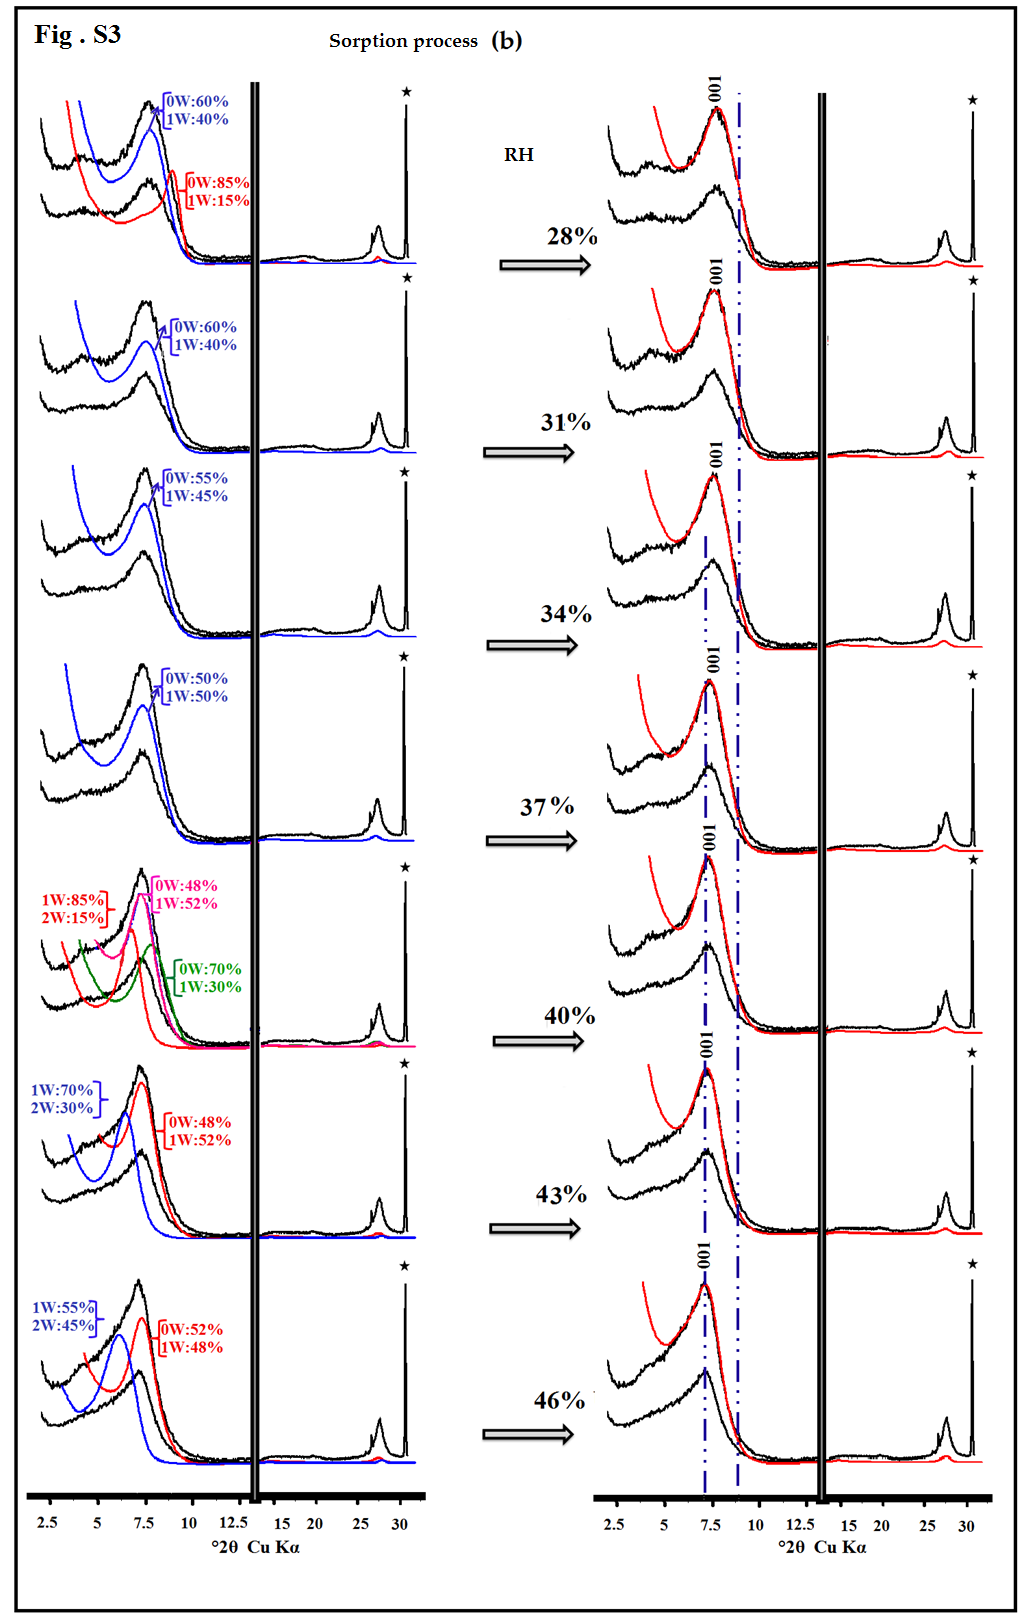

Supplement: f1 [file 5219624.f1.zip › Figure S3b.tif]

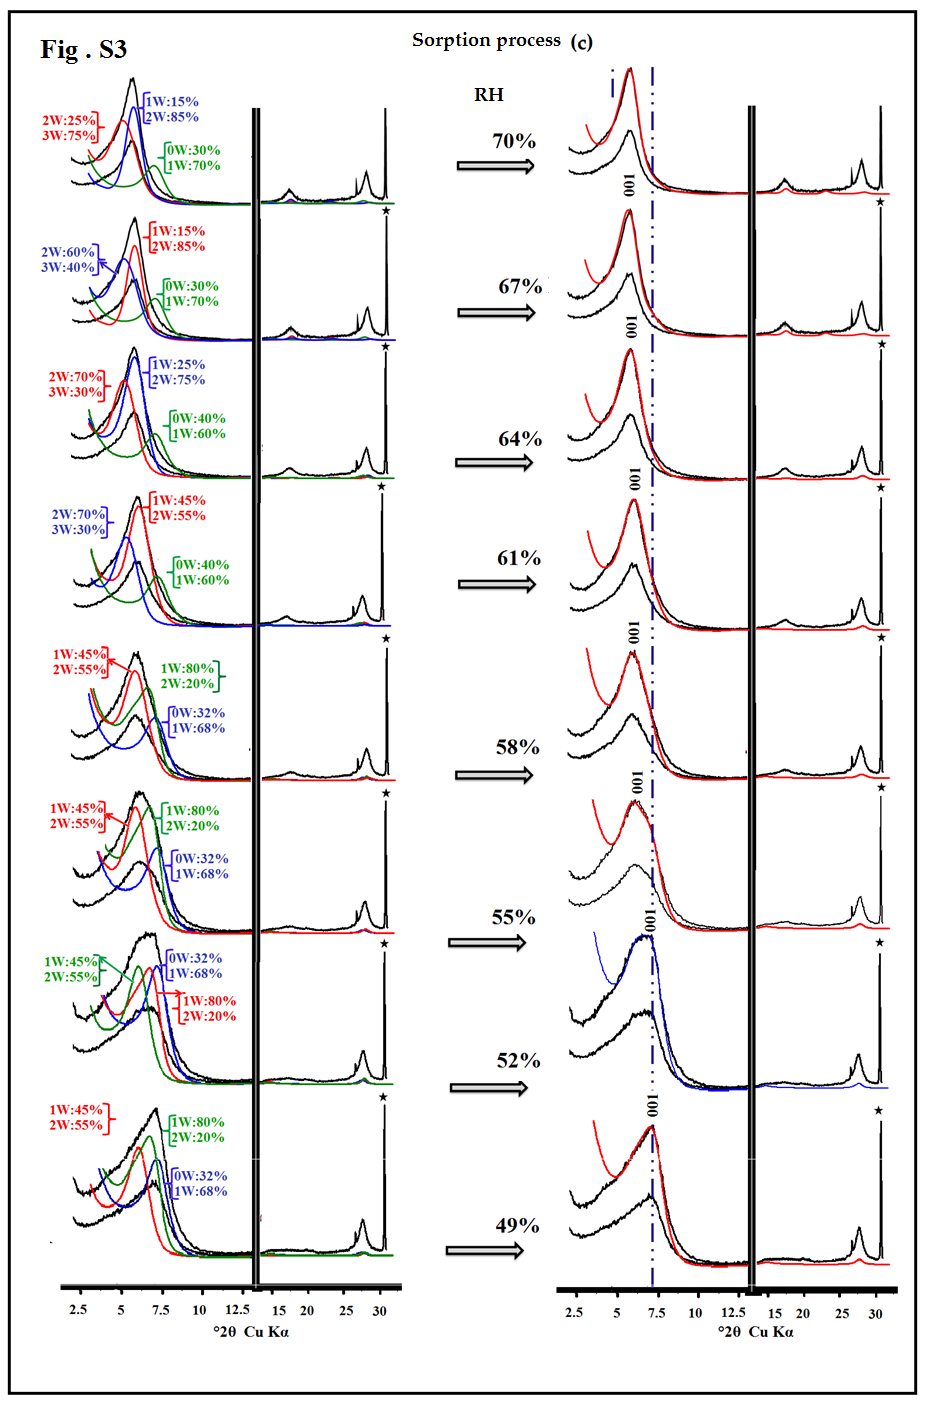

Supplement: f1 [file 5219624.f1.zip › Figure S3c.tif]

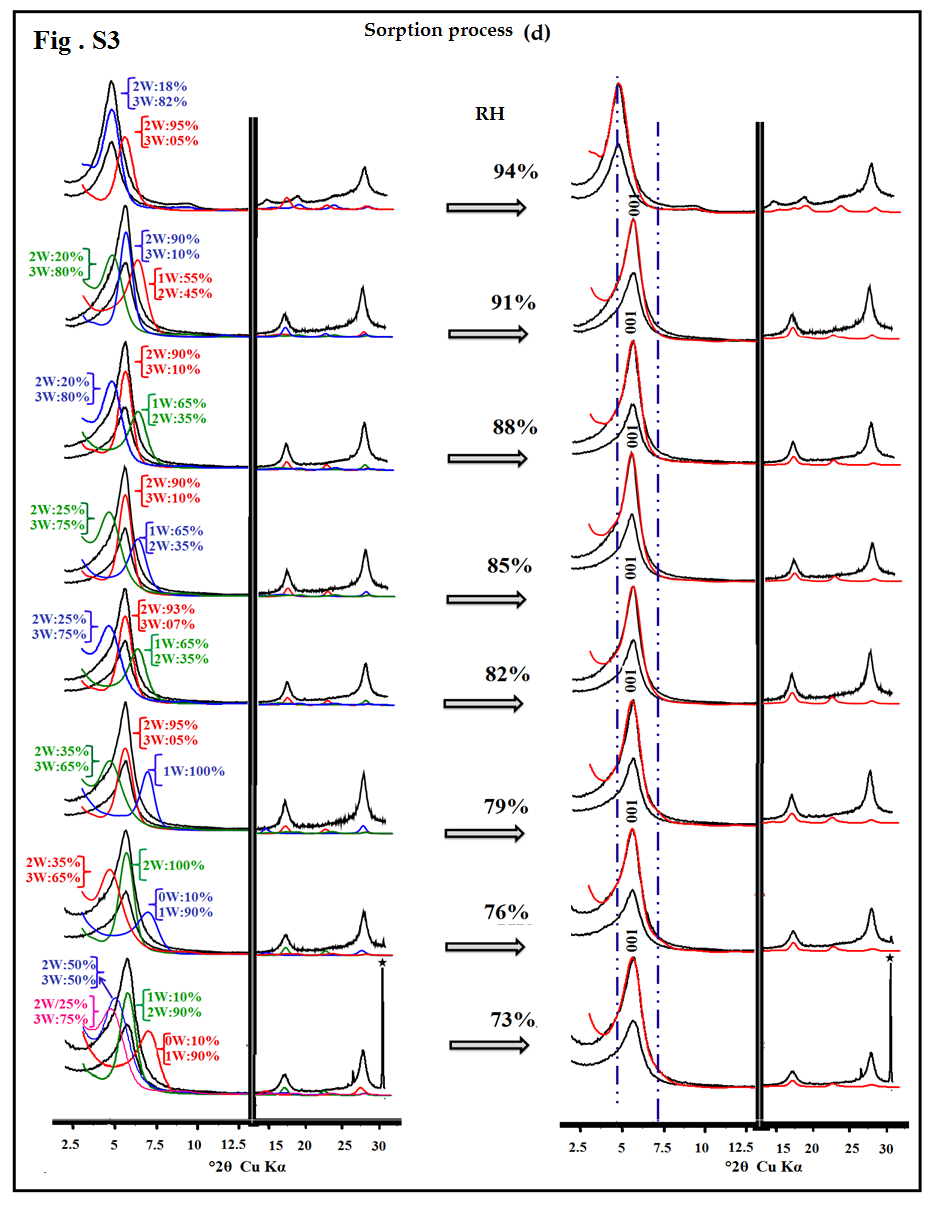

Supplement: f1 [file 5219624.f1.zip › Figure S3d.tif]

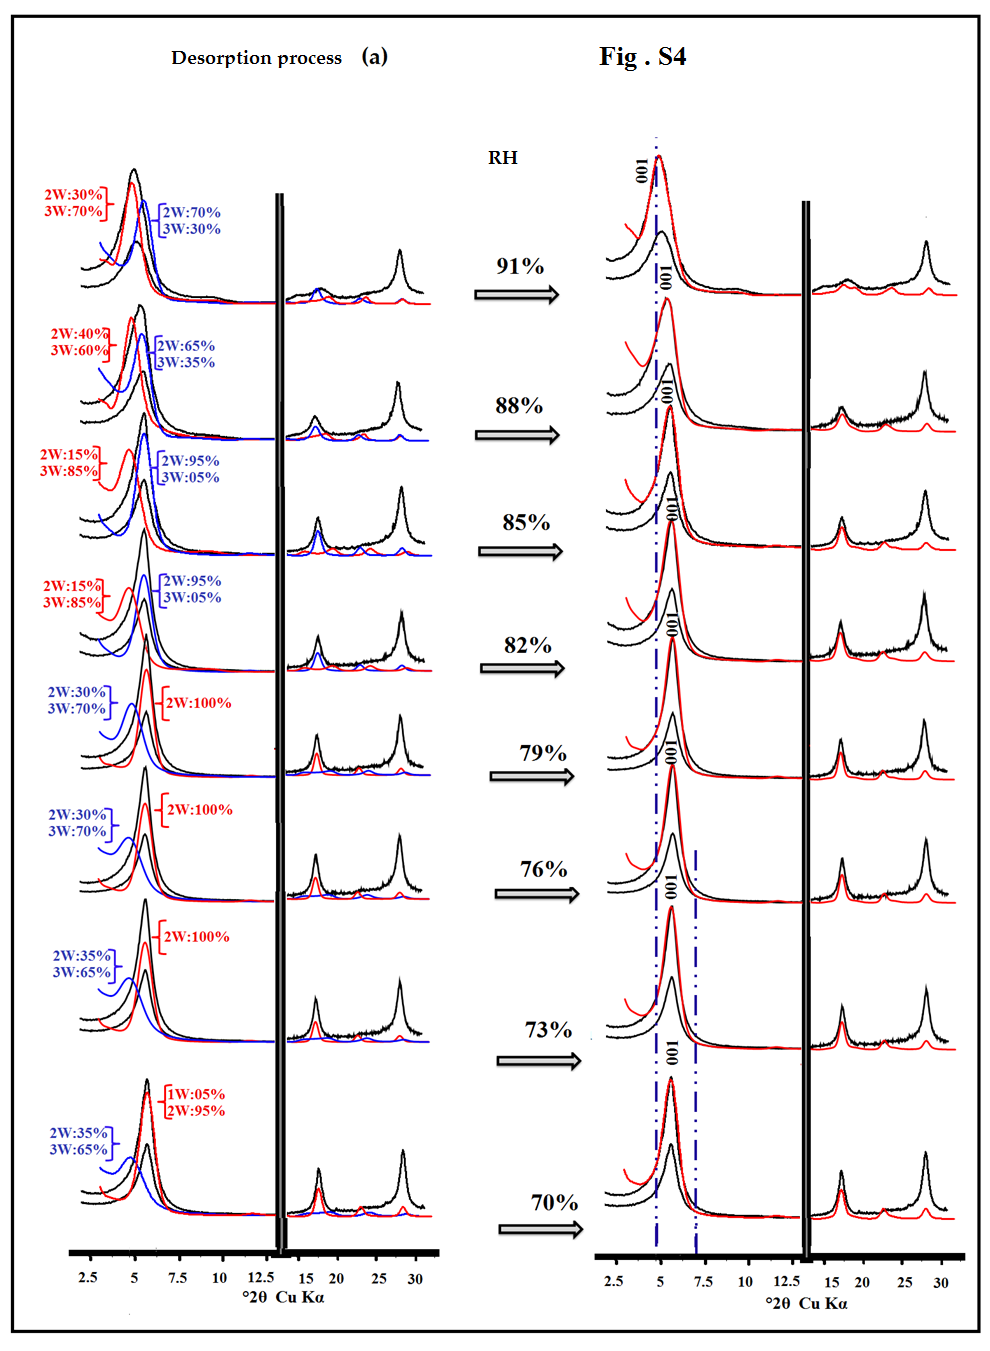

Supplement: f1 [file 5219624.f1.zip › Figure S4a.tif]

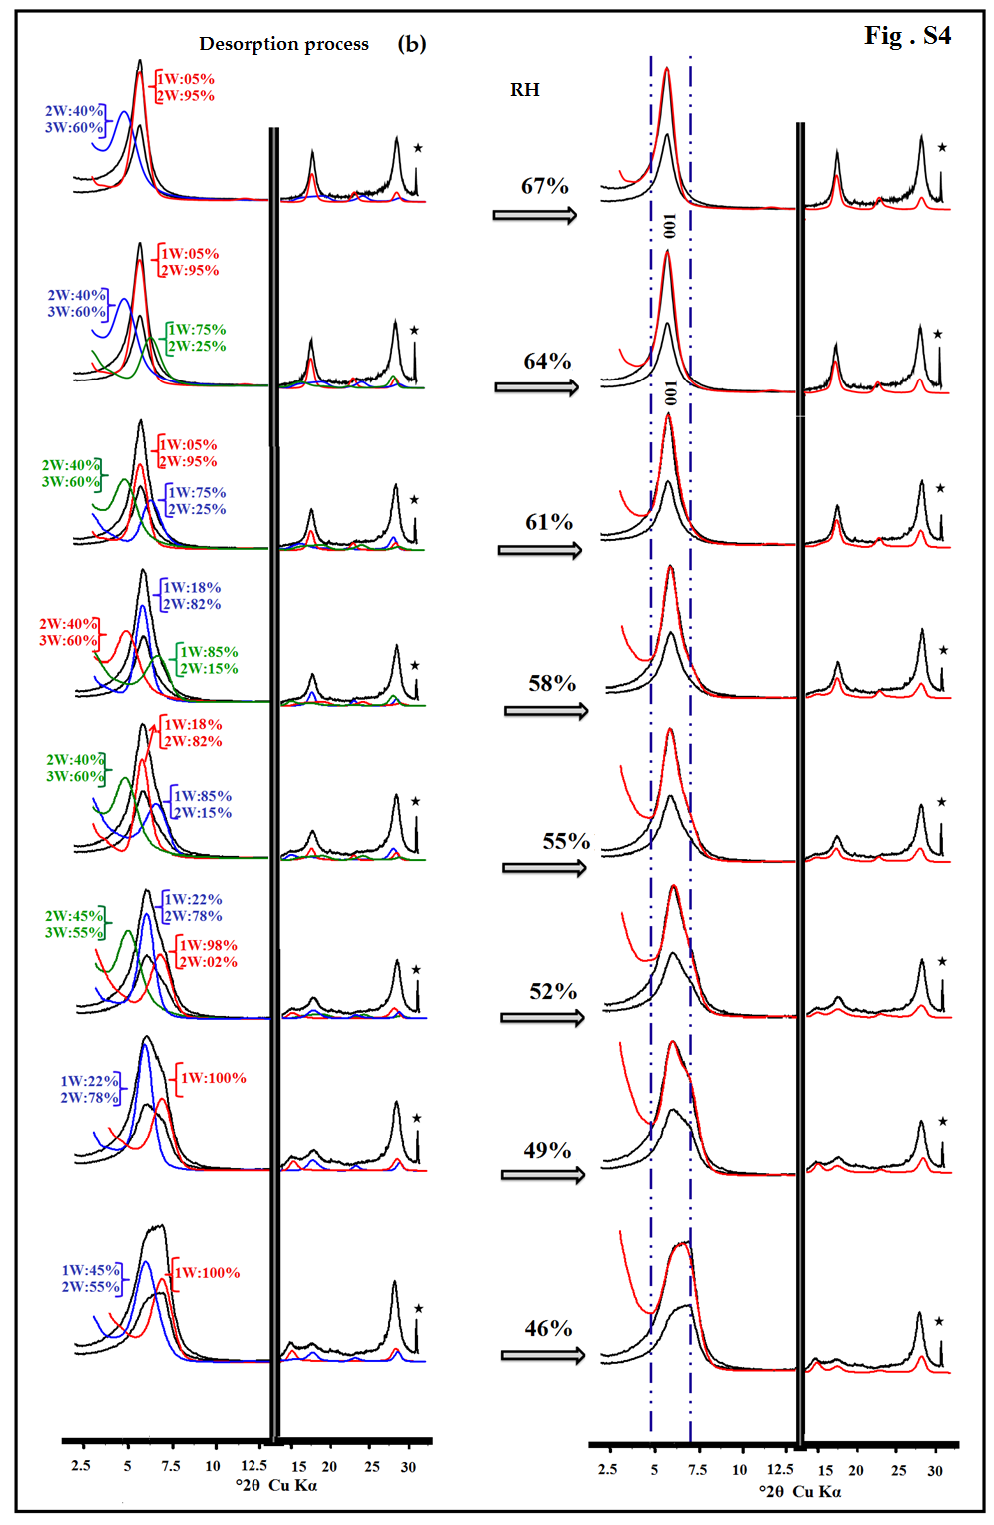

Supplement: f1 [file 5219624.f1.zip › Figure S4b.tif]

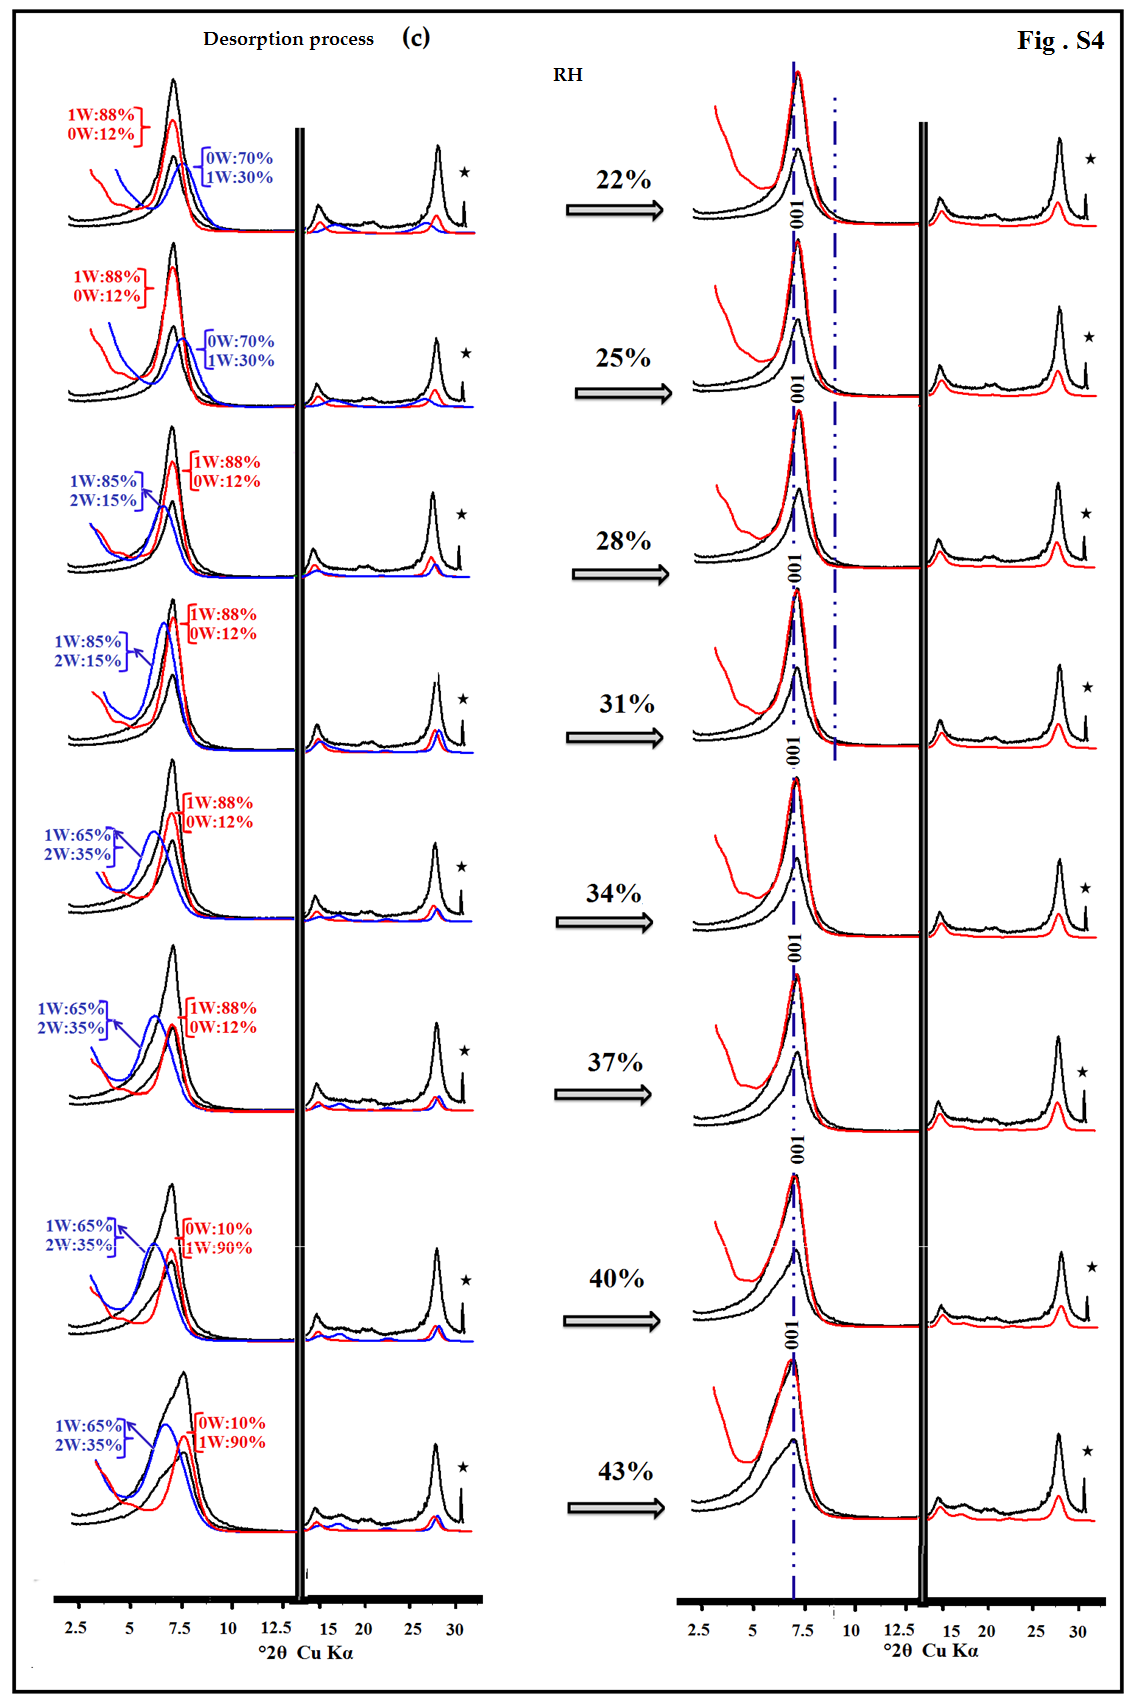

Supplement: f1 [file 5219624.f1.zip › Figure S4c.tif]

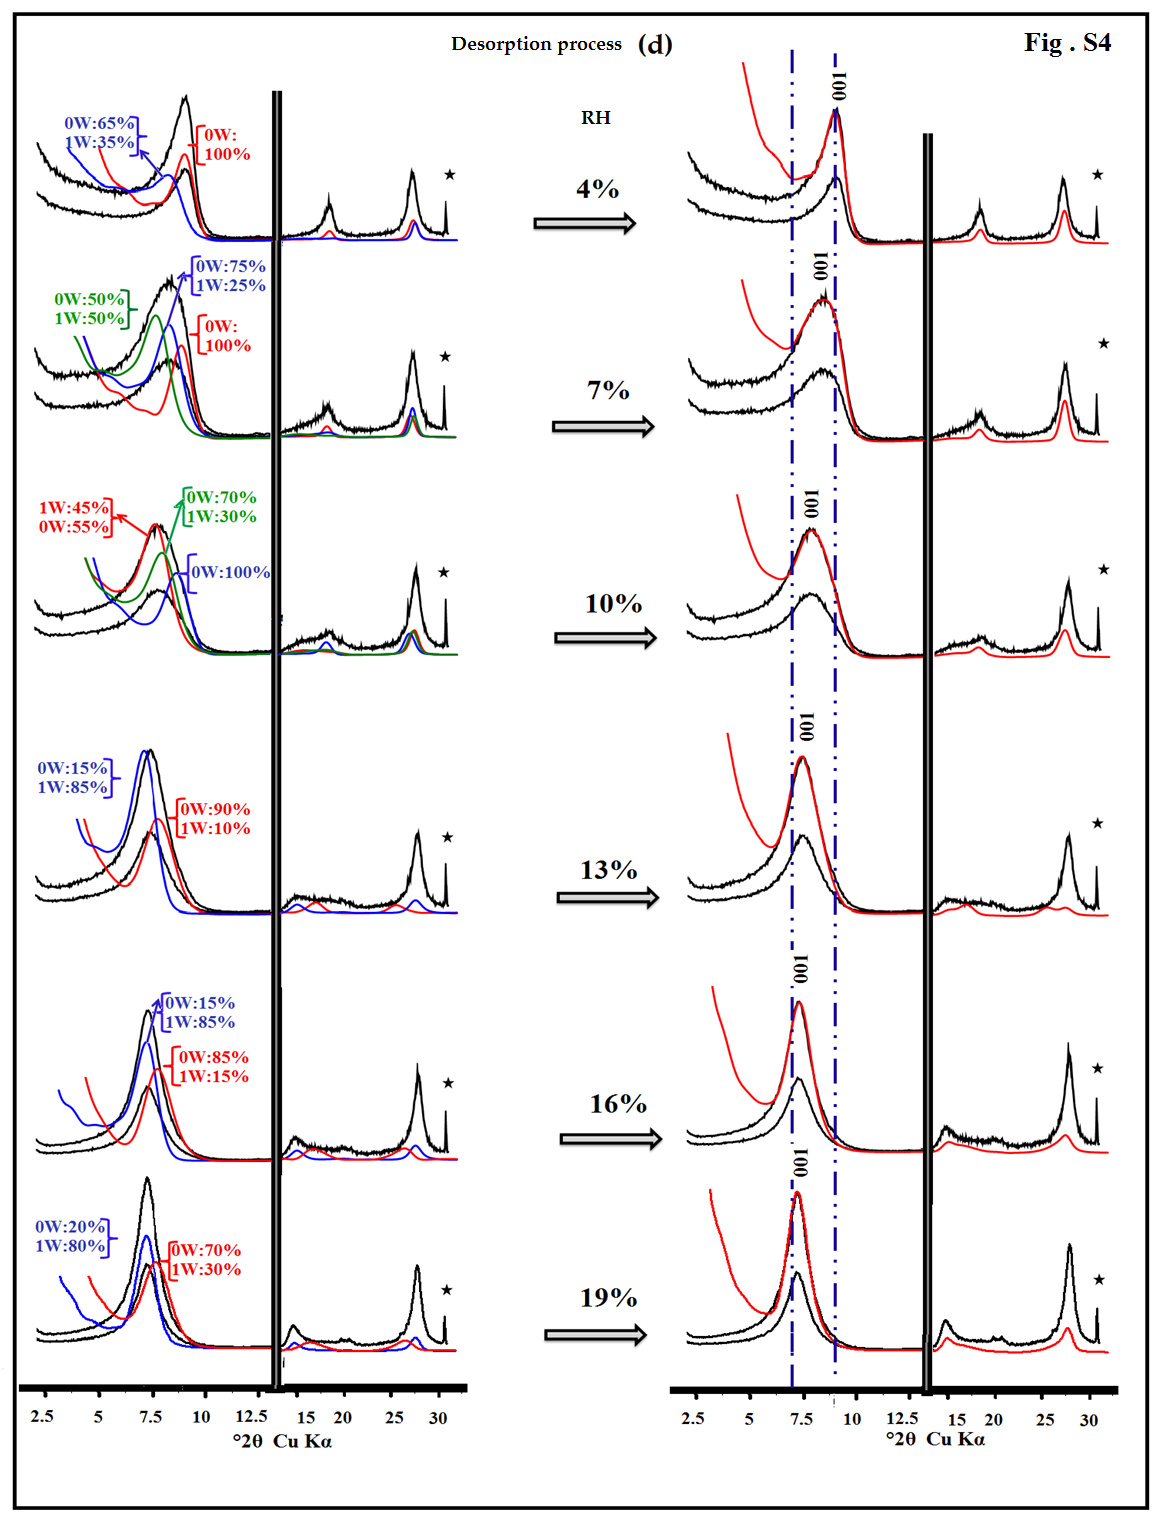

Supplement: f1 [file 5219624.f1.zip › Figure S4d.tif]
